# Supplementary material
Source: Springer Nature journal article supplement (https://www.springermedizin.de/resource/supplementary/12937_2013_687_MOESM1_ESM.pdf/25653610)

**A**

Average number of CV risk factors per participant

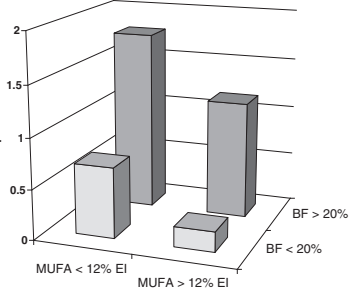**B**

Average number of risk factors per participant

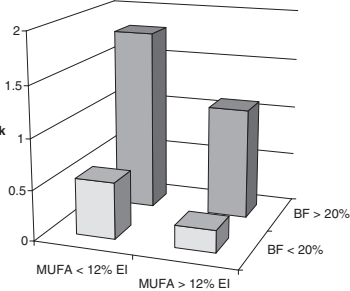

Supplement: MOESM1 [file 25653610]
